# Supplementary material
Source: Springer Nature journal article supplement (https://www.springermedizin.de/resource/supplementary/12936_2013_2936_MOESM17_ESM.pdf/9544554)

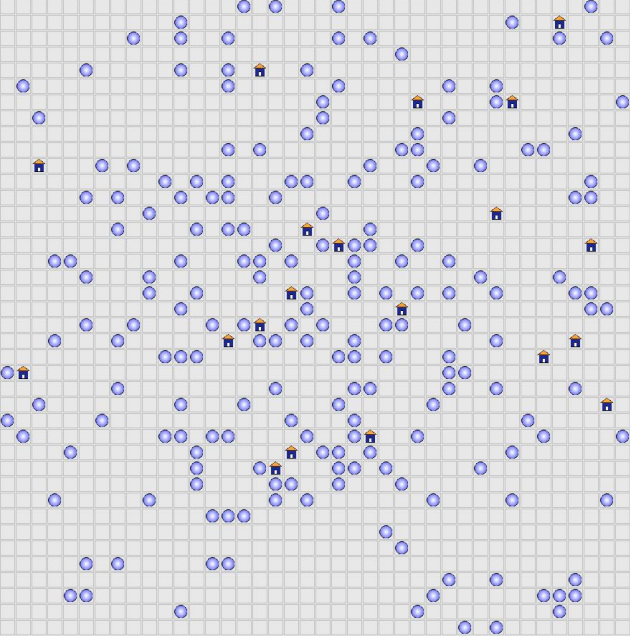

(a)  $density_{houses}$ : Low

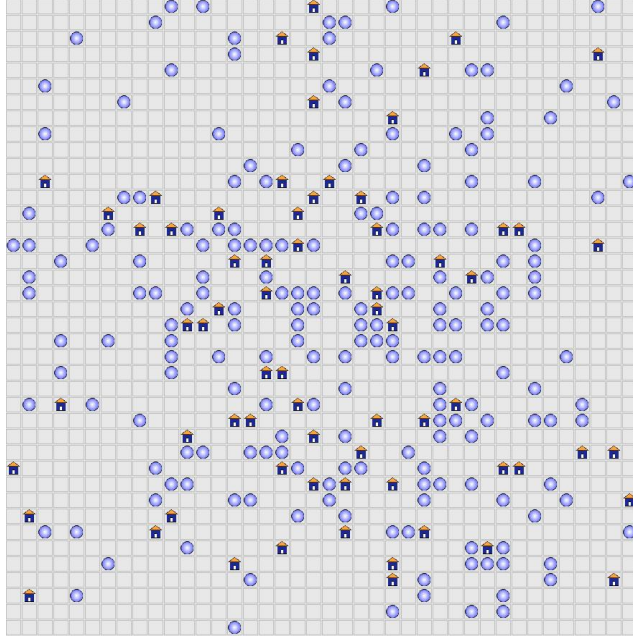

(b)  $density_{houses}$ : Medium

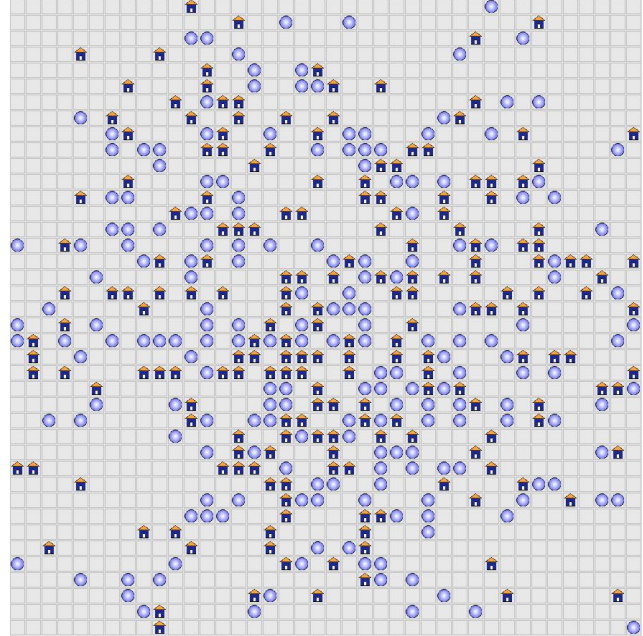

(c)  $density_{houses}$ : High

Supplement: MOESM17 [file 9544554]
